# Supplementary material for: Bedtime versus morning use of antihypertensives for cardiovascular risk reduction (BedMed): protocol for a prospective, randomised, open-label, blinded end-point pragmatic trial
Source: HighWire-hosted journal article supplement (doi:10.1136/bmjopen-2021-059711), 2022-02-01
Supplement: bmjopen-2021-059711supp001_data_supplement.pdf [file bmjopen-2021-059711supp001_data_supplement.pdf]

*Dr. John/Jane Doe*

Family Medicine Clinic Name

Street Address

City, Province, Postal Code

PHONE XXX-XXX-XXXX | FAX: XXX-XXX-XXXX

*Today's Date*

To my patients,

Our office is participating in a national blood pressure study led by the University of Alberta. We are sending this letter to all our patients with high blood pressure as an invitation to participate.

Research suggests that the ability of blood pressure pills to reduce heart attack and stroke may vary by 50% or more depending on the time of day those medicines are taken. This new study will help us to understand if altering the timing of blood pressure medicine can be used to better prevent heart attack and stroke.

The study involves randomly assigning participants to either take at least one of their current blood pressure medications either in the morning, or in the evening. Health outcomes would then be followed for up to 3 years.

If you choose to participate, our office will assist you in making and monitoring any medication changes that might be required. We believe this is an important study, but please know that your participation is voluntary. Whether or not you participate in no way affects our relationship.

**For more information or to participate in the study, please call:**

**Toll free 1-844-492-7570**

(7am-5pm Alberta time)

Email: [bedmed@ualberta.ca](mailto:bedmed@ualberta.ca)

Website: [www.pragmatictrials.ca/bedmed](http://www.pragmatictrials.ca/bedmed)

Sincerely,

*John or Jane Doe MD*
